# Supplementary material for: Hydrodehalogenation of 1,1-dibromocyclopropanes by Grignard reagents promoted by titanium compounds †
Source: Royal Society of Chemistry journal article supplement (doi:10.1039/a910317l), 2000-01-01
Supplement: a910317l.doc [file a910317l.doc]

**Supplementary data**

**Hydrodehalogenation of 1,1-dibromocyclopropanes by Grignard reagents promoted by titanium compounds**

**Juma'a R. Al Dulayymi,*a* Mark S. Baird,*a* Ivan G. Bolesov,*b* Alexey V. Nizovtsev*b* and Viacheslav V. Tverezovsky*b***

*a* *Department of Chemistry, University of Wales, Bangor, UK LL57 2UW*

*b* *Department of Chemistry, State University of Moscow, Moscow, Russia*

**Expanded versions of Tables 3, 4 and 6; Tables 7–10, 12; Scheme A; experimental details for a number of the syntheses and reactions described in the text; and additional spectroscopic data for known compounds**

**Scheme A**

**Table 3** Reduction of **1a** with Grignard reagents in ether with no catalyst*a*

| N | Grignard | Total  Grignard/  mol. eq. | Time of  stirring | **1a** | **2a** and **3a** | **4a** | **6** |
| --- | --- | --- | --- | --- | --- | --- | --- |
| 14 | MeMgBr | 1.30 | 10 min | 67 | 33 | 0 | 0 |
|  |  |  | 1 h  24 h | 39  13 [15] | 61  85 [85, 2.4:1] | 0  2 [0] | 0  0 |
| 15 | EtMgBr*b* | 1.30 | 10 min | 96 | 2 | 0 | 2 |
|  |  |  | 1 h | 88 | 5 | 0 | 7 |
|  |  |  | 4 h | 78 | 9 | 0 | 13 |
|  |  |  | 24 h | 43 [57] | 10 [9, 1.6:1] | 0 | 47 [34] |
| 16 | *sec*-BuMgBr | 1.00 | 30 min | 44 | 37 | 1 | 18 |
|  |  |  | 2 h | 36 | 36 | 1 | 28 |
|  |  | 2.00 | 1 h | 13 [21] | 38 [53(1.5:1)] | 1 | 49 [26] |
| 17 | 3-PentylMgBr | 1.00 | 10 min | 84 | 10 | 0 | 6 |
|  |  |  | 1 h | 63 | 17 | 0 | 20 |
|  |  |  | 18 h | 41 [43] | 21 [18(1.6:1)] | 0 | 38 [39] |
| 18 | *t*-BuMgBr | 1.00 | 10 min | 97 | 3 | 0 | 0 |
|  |  |  | 1 h | 78 | 12 | 0 | 0 |
|  |  |  | 14 h | 62 | 38 | 0 | 0 |
|  |  | 2.00 | 1 h | 41 | 59 | 0 | 0 |
|  |  |  | 8 h | 23 [27] | 77 [73(1.7:1)] | 0 | 0 |
| 19 | *t*-BuMgBr | 4.00 | 72 h | [4] | [96 (1.7:1)] | [0] | [<1] |
| 20 | PhMgBr | 1.00 | 10 min | 95 | 5 | 0 | 0 |
|  |  |  | 1 h | 93 | 7 | 0 | <1 |
|  |  |  | 24 h | 73 [74] | 27 [26(2.3:1)] | 0 | 6 [-] |
| 21 | PhCH2MgBr | 1.00 | 16 h | 81 [78] | 19 [22(1.8:1)] | 0 | 0 |
| 22 | PhCH2CH2MgBr | 1.00 | 10 min | 98 | 2 | 0 | 0 |
|  |  |  | 1 h | 97 | 3 | 0 | <1 |
|  |  |  | 22 h | 90 | 6 | 0 | 4 |
|  |  |  | 51 h | 84 | 10 | 0 | 6 |
|  |  | 2.00 | 1.5 h | 83 | 10 | 0 | 7 |
|  |  |  | 24 h | 73 [65] | 14 [23(2.8:1)] | 0 | 13 [13] |
| *a* In this and the following Tables: 1) each block of results corresponds to a single experiment; *e.g.* in 16, 1 mol. eq. of *sec*-BuMgBr was added initially followed by a second mol. eq. after 2 h and the products analysed after an additional1 h; 2) in each case the initial 10 min corresponded to the time for addition of the reagents; 3) all figures are either relative GLC peak areas or those in [ ] represent the 1H NMR analysis of the crude reaction product at the end of each reaction based on integration. *b* The ratio between **2a**–**3a** and **6** and the rate of reduction seem to depend somewhat on the age of the EtMgBr in the uncatalysed reaction. | | | | | | | |

.

**Table 4** Reduction of **1a** with different Grignards with Ti(OiPr)4 in ether*a*

| N | Grignard | Grignard/  mol. eq. | Ti(OiPr)4/  mol% | Time of  stirring | **1a** | **2a** and **3a** | **4a** | **6** |
| --- | --- | --- | --- | --- | --- | --- | --- | --- |
| 23 | MeMgBr | 1.30 | 10 | 10 min | 50 | 50 | 0 | 0 |
|  |  |  |  | 1 h | 21 | 79 | 0 | 0 |
|  |  |  |  | 24 h | 5 [6] | 93 [94, (2.3:1)] | 2 [0] | 0 [0] |
| 24 | EtMgBr | 1.30 | 2 | 10 min | 2 [0] | 98 [94*b* (2.0:1)] | 0 [0] | 0 [0] |
| 25 | EtMgBr*c* | 3.00 | 10 | 1.5 h | 0 [0] | 0 [0] | 97 [93*b*] | 0 [0] |
| 26 | *sec*-BuMgBr | 0.80 | 5 | 10 min | 21 | 79 | 0 | 0 |
|  |  |  |  | 30 min | 21 | 79 | 0 | 0 |
|  |  | 1.04 |  | 30 min | <1 [0] | 100 [97*b* (2.0:1)] | 0 [0] | 0 [0] |
| 27 | *sec* –BuMgBr | 2.40 | 10 | 30 min | 0 | 26 | 74 | 0 |
|  |  |  |  | 10 h | 0 | 13 | 87 | 0 |
|  |  | 2.64 |  | 30 min | 0 [0] | <1 [0] | >99 [95*b*] | 0 [0] |
| 28 | 3-PentylMgBr | 1.3 | 2 | 10 min | 65 | 30 | 0 | 5 |
|  |  |  |  | 1 h | 47 | 45 | 0 | 8 |
|  |  |  |  | 3 h | 39 [33] | 45 [49 (1.5:1)] | 0 [0] | 16 [18] |
| 29 | 3-PentylMgBr | 1.00 | 10 | 10 min | 20 | 80 | 0 | 0 |
|  |  |  |  | 30 min | 20 | 80 | 0 | 0 |
|  |  | 1.25 |  | 10 min | 5 | 95 | 0 | 0 |
|  |  |  |  | 30 min | 4 | 96 | 0 | 0 |
|  |  | 1.30 |  | 10 min | 3 [0] | 97 [100 (2.0:1)] | 0 [0] | 0 [0] |
| 30 | 3-PentylMgBr | 2.00 | 10 | 10 min | 0 | 79 | 21 | 0 |
|  |  |  |  | 1 h | 0 | 75 | 25 | 0 |
|  |  | 3.00 |  | 17 h | 0 | 22 | 78 | 0 |
|  |  | 4.00 |  | 1 h | 0 | 13 | 87 | 0 |
|  |  |  |  | 42 h | 0 [0] | 4 [0] | 96 [100] | 0 [0] |
| 31 | *t*-BuMgBr | 1.00 | 10 | 10 min | 90 | 10 | 0 | 0 |
|  |  |  |  | 30 min | 83 | 17 | 0 | 0 |
|  |  |  |  | 1 h | 73 | 27 | 0 | 0 |
|  |  |  |  | 4 h | 56 | 44 | 0 | 0 |
|  |  | 2.00 |  | 30 min | 45 | 55 | 0 | 0 |
|  |  |  |  | 1 h | 37 | 63 | 0 | 0 |
|  |  |  |  | 14 h | 4 [3] | 96 [97 (1.9:1)] | 0 [0] | 0 [0] |
| 32 | PhMgBr | 1.00 | 2 | 10 min | 47 | 53 | 0 | 0 |
|  |  |  |  | 30 min | 26 | 73 | 1 | 0 |
|  |  | 1.50 |  | 10 min | 10 | 88 | 2 | 0 |
|  |  |  |  | 20 min | 5 [0] | 93 [100 (2.6:1)] | 3 [0] | 0 [0] |
| 33 | PhMgBr | 2.00 | 10 | 10 min | 0 | 90 | 10 | 0 |
|  |  |  |  | 1 h | 0 | 72 | 28 | 0 |
|  |  | 3.00 |  | 30 min | 0 | 44 | 56 | 0 |
|  |  |  |  | 1 h | 0 | 35 | 65 | 0 |
|  |  | 4.00 |  | 30 min | 0 | 22 | 78 | 0 |
|  |  |  |  | 1 h | 0 | 18 | 82 | 0 |
|  |  |  |  | 14 h | 0 [0] | 0 [0] | 100 [100] | 0 [0] |
| 34 | PhCH2MgBr | 1.00 | 10 | 16 h | 59 [58] | 41 [42 (1.8:1)] | 0 [0] | 0 [0] |
| 35 | PhCH2CH2MgBr | 1.00 | 2 | 10 min | 19 | 81 | 0 | 0 |
|  |  |  |  | 30 min | 20 | 80 | 0 | 0 |
|  |  | 1.25 |  | 10 min | 3 | 94 | 3 | 0 |
|  |  |  |  | 30 min | 3 | 93 | 4 | 0 |
|  |  | 1.30 |  | 10 min | 3 [0] | 92 [100 (1.8:1)] | 5 [0] | 0 [0] |
| 36 | PhCH2CH2MgBr | 1.00 | 10 | 10 min | 18 | 77 | 5 | 0 |
|  |  | 2.00 |  | 10 min | 0 | 89 | 11 | 0 |
|  |  |  |  | 1 h | 0 | 83 | 17 | 0 |
|  |  | 3.00 |  | 30 min | 0 | 70 | 30 | 0 |
|  |  |  |  | 4 h | 0 | 49 | 51 | 0 |
|  |  | 4.00 |  | 11 h | 0 | 17 | 83 | 0 |
|  |  | 5.00 |  | 3 h | 0 | 16 | 84 | 0 |
|  |  |  |  | 24 h | 0 [0] | 3 [0] | 97 [100] | 0 [0] |
| *a* These reaction mixtures were quenched with D2O. There was no deuterated monobromide in the products by GC/MS or 1H NMR spectroscopy. *b* Isolated yield. *c* With less than 3 mol. eq. of EtMgBr, the reaction did not go to completion. | | | | | | | | |

**Table 6** Reduction of **1a** and **2a** + **3a** (entry 44) with phenethylmagnesium bromide in ether*a*

| N | Grignard/  mol. eq. | Ti(OiPr)4/  mol% | Time of  stirring | **1a** | **2a** and **3a** | **4a** | **6** | Ethyl-  benzene | Styrene | **17** | **18** | -Phenyl-  ethyl  bromide |
| --- | --- | --- | --- | --- | --- | --- | --- | --- | --- | --- | --- | --- |
| 40 | 1.00 | 0 | 10 min | 98 | 2 | 0 | - | 68 | <1 | 1 | 6 | <<1 |
|  |  |  | 1 h | 97 | 3 | 0 | - | 66 | 1 | 2 | 6 | <1 |
|  |  |  | 9 h | 93 | 5 | 0 | 2 | 57 | 2 | 2 | 6 | 5 |
|  |  |  | 22 h | 90 | 6 | 0 | 4 | 49 | 4 | 3 | 7 | 6 |
|  |  |  | 51 h | 84 | 10 | 0 | 6 | 32 | 4 | 4 | 7 | 12 |
|  | 2.00 |  | 1.5 h | 83 | 10 | 0 | 7 | 143 | 6 | 5 | 16 | 13 |
|  |  |  | 24 h | 73 [65] | 14 [23 (2.8:1)] | 0 [0] | 13 [13] | 152 [166] | 7 [7] | 6 | 16 | 21 [19] |
| 41*b* | 0.80 | 2 | 5 min | 35 [29] | 65 [72 (2.0:1)] | 0 [0] | 0 [0] | 29 [64] | 5 [2] | 32 | 5 | 0 [0] |
| 42*c* | 1.00 | 2 | 10 min | 19 | 81 | 0 | 0 | 37 | 5 | 30 | 6 | 0 |
|  |  |  | 30 min | 20 | 80 | 0 | 0 | 37 | 5 | 29 | 7 | 0 |
|  | 1.25 |  | 10 min | 3 | 94 | 3 | 0 | 60 | 7 | 32 | 9 | 0 |
|  |  |  | 30 min | 3 | 93 | 4 | 0 | 70 | 7 | 32 | 10 | 0 |
|  | 1.30 |  | 10 min | 3 [0] | 92 [100(1.8:1)] | 5 [0] | 0 [0] | 61 [100] | 6 [6] | 31 | 8 | 0 [0] |
| 43 | 1.00 | 10 | 10 min | 18 | 77 | 5 | 0 | 38 | 6 | 17 | 3 | 0 |
|  | 2.00 |  | 10 min | 0 | 89 | 11 | 0 | 112 | 10 | 15 | 7 | 0 |
|  |  |  | 30 min | 0 | 84 | 16 | 0 | 124 | 11 | 17 | 13 | 0 |
|  |  |  | 1 h | 0 | 83 | 17 | 0 | 91 | 9 | 17 | 11 | 0 |
|  | 3.00 |  | 30 min | 0 | 70 | 30 | 0 | 206 | 13 | 18 | 17 | 0 |
|  |  |  | 4 h | 0 | 49 | 51 | 0 | 220 | 17 | 21 | 20 | 0 |
|  | 4.00 |  | 11 h | 0 | 17 | 83 | 0 | 358 | 23 | 27 | 32 | 0 |
|  | 5.00 |  | 3 h | 0 | 16 | 84 | 0 | 471 | 29 | 24 | 38 | 0 |
|  |  |  | 24 h | 0 [0] | 3 [0] | 97 [100]e | 0 [0] | 479 [500] | 32 [34] | 28 | 46 [50] | 0 [0] |
| 44*d* | 2.00 | 10 | 30 min | 0 | 63 | 37 | 0 | 194 | 13 | 3 | 14 | 0 |
|  |  |  | 1 h | 0 | 55 | 45 | 0 | 229 | 15 | 3 | 12 | 0 |
|  | 3.00 |  | 18 h | 0 [0] | 3 [0] | 97 [100]e | 0 [0] | 273 [293] | 25 [29] | 6 | 16 [25] | 0 [0] |
| *a* Quenching the Grignard reagent with D2O gave >88% of ethylbenzene, <1.6% of styrene and <10% of **18** by GLC; 91% ethylbenzene, 1% of styrene, 6% of **18** and 2% of phenethyl alcohol was deuterated by GC/MS data. *b* The layers were separated after addition of 0.8 mol. eq. of Grignard reagent. The bottom layer contained ether and phenethyl alcohol by 1H NMR in D2O. The upper layer was quenched with D2O. The D2O layer contained only ether. The organic layer contained the products shown in entry 41, by 1H NMR. *c* One half of the ether was distilled from the reaction mixture at atmospheric pressure (there was no ethyl vinyl ether in the distillate by GLC) and then this ether was treated with bromine. There were no new products by GLC or 1H NMR. The rest of reaction mixture was treated with D2O. The bottom layer contained D2O and ether by 1H NMR. Nondeuterated **2a** and **3a** were isolated from the upper layer. *d* Quenched after 18 h with D2O. PhCH2CH2D:PhCH2CH3 =1.7:1 by GC/MS. | | | | | | | | | | | | |

**Table 7 Hydrocarbon products of reaction of PhCH2CH2MgBr with Ti(OiPr)4 in ether (by 1H NMR)**

| N | Grignard/  mol. eq. | Ti(OiPr)4/  mol% | Time of stirring | Ethylbenzene  (% of deuterium by GC/MS) | Styrene | **18** |
| --- | --- | --- | --- | --- | --- | --- |
| 45 | 1.0 | 0 | 84 h | 92 (81) | 0.5 | 7 |
| 46 | 1.0 | 0 | 84 h | 90 (88) | - | 10 |
| 47 | 1.0 | 10 | 84 h | 76 (64) | 6 | 18 |
| 48 | 1.0 | 10 | 84 h | 76 (53) | 7 | 17 |
| 49 | 1.0 | 20 | 1 h | 79 (13) | 8 | 8 |

To determine the effect of the solvent on the reaction, ethylmagnesium bromide was prepared in anisole solution. The results of reductions of **1a** carried out in this system are summarised in Table 8. In the first experiment, the addition of titanium isopropoxide led to a considerable increase in the degree of reduction, but the reaction did not appear to proceed any further after 10 min. The degree of reduction was small (*ca*. 10%), and the source of the hydrogen in this case could be the isopropoxy groups present in the 5 mol% of catalyst. The addition of 0.5 mol. eq. of ether did appear to lead to some further reaction. Indeed, a comparison of experiments 51 and 52 indicates that ether does have some effect. In the final experiment the gases produced were collected. It appears that after 2 min little further gas evolution occurs with 1 mol. eq. of the Grignard, about 40% of the dibromide having been reduced; at this stage 0.38 mmol of gas had been produced. Further addition of 1.5 mol. eq. of Grignard led to a *ca.* 1:87:12 ratio of **1a** to **2a**–**3a** to **4a** or **3a** and an additional 0.30 mol. eq. of gas were produced. The gas was a mixture of ethane and ethene by MS.

**Table 8 Reduction of 1a with ethylmagnesium bromide with Ti(OiPr)4 in anisole*a***

| N | PhCH2CH2MgBr/  mol. eq. | Ti(OiPr)4/  mol% | Time of  stirring | **1a** | **2a** and **3a** | **4a** | Gas evolution/  ml (mmol) |
| --- | --- | --- | --- | --- | --- | --- | --- |
| 50 | 1.00 | 0 | 10 min | 99 | 2 | — |  |
|  |  | 5 | 10 min | 90 | 9 | 0.5 |  |
|  |  |  | 30 min | 87 | 12 | 1 |  |
|  | *b* |  | 10 min | 68 [68] | 31 [32] | 1 [0] |  |
| 51*c* | 1.00 | 5 | 10 min | 28 | 70 | 2 |  |
|  |  |  | 1 h | 28 | 70 | 2 |  |
|  | 1.50 |  | 3.5 h | 1 [0] | 95 [95, 1.6:1] | 4 [5] |  |
| 52 | 1.00 | 5 | 1.7 h | 50 | 50 | 0.5 |  |
|  | 2.00 |  | 1.2 h | 20 | 77 | 3 |  |
|  |  |  | 15 h | 6 [6] | 89 [89, 1.6:1] | 5 [5] |  |
| 53 | 1.00 | 5 | 0 min | — | — | — | 8.7 (0.36) |
|  |  |  | 2 min | 60 | 39 | 0.5 | 9.1 (0.38) |
|  |  |  | 10 min | 58 | 41 | 1 | 9.1 (0.38) |
|  |  |  | 30 min | 58 | 41 | 1 | 9.1 (0.38) |
|  | 2.50 |  | 0 min | — | — | — | 14.9 (0.60) |
|  |  |  | 10 min | 10 | 85 | 5 | 16.0 (0.65) |
|  |  |  | 4 h | 0.5 [0] | 87 [86, 1.6:1] | 12 [14] | 16.6 (0.68) |
| *a* Three minor unidentified volatile components were also observed. *b* 0.50 mol. eq. of ether were added. *c* The Grignard reagent was added to a solution of dibromide with catalyst in anisole which contained 2.0 mol. eq. of ether. | | | | | | | |

Since the reduction was successful in anisole, CD3OC6H5 was prepared from perdeuteromethyl iodide, phenol and base. The Grignard reagent was then prepared in the deuterated solvent and used to reduce **1a** to the monobromides **2a** and **3a**; however, these showed no evidence of any deuterium incorporation.

**Table 9** Reduction of **1a** with phenethylmagnesium bromide in THF (N 54) and d8-THF (N 55)*a*

| N | PhCH2CH2MgBr/  mol. eq. | TiCl4/  mol% | Time of  stirring | **1a** | **2a** and **3a** | **4a** | Ethyl-  benzene | Styrene | **18** |
| --- | --- | --- | --- | --- | --- | --- | --- | --- | --- |
| 54 | 1.00 | 5 | 10 min | 45 | 55 | 0 | 45 | 10 | 2 |
|  |  |  | 30 min | 39 | 61 | 0 | 73 | 9 | 2 |
|  |  |  | 1 h | 40 | 60 | 0 | 68 | 16 | 2 |
|  | 1.6 |  | 1 h | 0 [0] | 97 [100, 1.5:1] | 3 | 129 [120] | 16 [15] | 4 |
| 55 | 1.2 | 5 | 10 min | 60 | 40 | 0 | 80c | 10 | 2 |
|  |  |  | 1 h | 57 [64] | 43 [36, 1.5:1*b*] | 0 | 111 [90] | 9 [12] | 2 |
| *a* Decomposing the Grignards with H2O gave 95% ethylbenzene, 1% styrene, and 2% **11** by GLC. *b* Major monobromide contains 30, minor 47% deuterium in position 1 by GC/MS and 1H NMR. *c* No deuterium incorporated into the ethylbenzene. | | | | | | | | | |

**Effects of the Grignard alkyl group on ether derived products**

A comparison of the products derived from the Grignard reagent and those derived from bromocyclo­propanes was made (Table 10) for phenyl-, benzyl- and phenethylmagnesium bromides. Particularly noticeable is the large amount of product derived from reaction of phenylmagnesium bromide with the solvent, ether. The relatively large amounts of product R-R observed in some experiments must be viewed in the light of the fact that quenching of the Grignard reagents themselves led to considerable quantities of these compounds and that in these particular experiments a number of mol. eq. of Grignard reagent had been added. It is noteworthy that no products which could formally assigned to coupling of a bromocyclopropyl or cyclopropyl radical and the ether derived radical **19** were observed in any of these reactions.

**Table 10** Reduction of **1a** and **2a**–**3a** (N 58) with arylmagnesium bromides in ether

| N | RMgBr | Grignard/  mol. eq. | Ti(OiPr)4/  mol% | Time of  stirring | **2a** and **3a** | **4a** | RH | Styrene |  | RR |
| --- | --- | --- | --- | --- | --- | --- | --- | --- | --- | --- |
| 56 | PhCH2CH2MgBr | 1.00 | 2 | 10 min | 81 | 0 | 37 | 5 | 29 | 7 |
|  |  | 1.25 |  | 10 min | 94 | 3 | 60 | 7 | 32 | 9 |
|  |  | 1.30 |  | 10 min | 92 [100 (1.8:1)] | 5 [0] | 61 [100] | 6 [6] | 31 [—] | 8 [—] |
| 57 | PhCH2CH2MgBr | 1.00 | 10 | 10 min | 77 | 5 | 38 | 6 | 17 | 3 |
|  |  | 2.00 |  | 10 min | 89 | 11 | 112 | 10 | 15 | 7 |
|  |  |  |  | 1 h | 83 | 17 | 91 | 9 | 17 | 11 |
|  |  | 3.00 |  | 4 h | 49 | 51 | 220 | 17 | 21 | 20 |
|  |  | 4.00 |  | 11 h | 17 | 83 | 358 | 23 | 27 | 32 |
|  |  | 5.00 |  | 24 h | 3 [0] | 97 [100] | 479 [500] | 32 [34] | 28 [—] | 46 [50] |
| 58 | PhCH2CH2MgBr | 2.00 | 10 | 30 min | 63 | 37 | 194 | 13 | 3 | 14 |
|  |  |  |  | 1 h | 55 | 45 | 229 | 15 | 3 | 12 |
|  |  | 3.00 |  | 18 h | 3 [0] | 97 [100] | 273 [293] | 25 [29] | 6 [—] | 16 [25] |
| 59 | PhCH2MgBr | 5.00 | 22 | 13 h | 60 | 2 | 143 | — | 60 | 61 |
|  |  |  |  | 36 h | 83 [88 (1.8:1)] | 16 [12] | 149 [133] | — [—] | 84 [64] | 71 [57] |
| 60 | PhCH2MgBr | 1.00 | 10 | 16 h | 41 [42 (1.8:1)] | 0 [0] | 33 [27] | — [—] | 33 [20] | 41 [15] |
| 61 | PhMgBr | 1.00 | 2 | 10 min | 53 | <1 | 31 | — | 46 | 3 |
|  |  |  |  | 30 min | 73 | 1 | 24 | — | 74 | 4 |
|  |  | 1.50 |  | 10 min | 88 | 2 | 40 | — | 75 | 6 |
|  |  |  |  | 20 min | 93 [100 (2.6:1)] | 3 [0] | 40 [—] | — | 79 [83] | 6 [-] |
| 62 | PhMgBr | 2.00 | 10 | 10 min | 90 | 10 | 46 | — | 90 | 12 |
|  |  |  |  | 1 h | 72 | 28 | 35 | — | 99 | 18 |
|  |  | 3.00 |  | 30 min | 44 | 56 | 93 | — | 114 | 27 |
|  |  |  |  | 1 h | 35 | 65 | 86 | — | 114 | 29 |
|  |  | 4.00 |  | 30 min | 22 | 78 | — | — | 120 | 37 |
|  |  |  |  | 1 h | 18 | 82 | — | — | 118 | 42 |
|  |  |  |  | 14 h | 0 [0] | 100 [100] | 127 [127] | — [—] | 116 [111] | 51 [-] |

In order to try to compare the rates of the present hydrodebromination and the standard Kulinkovich reaction with an ester, a competition experiment was carried out with a 1:1 mixture of **1a** and ethyl butyrate (Table 12). This showed that if less than 1 mol. eq. of the Grignard reagent was added, the primary reaction was with the dibromide. However, as more reagent was added, increasing amounts of 1-propylcyclopropanol and 3-ethylhexan-3-ol were observed; presumably the latter is a major product from ethyl butyrate because the amount of added titanium isopropoxide is only 2 mol% in this experiment, whereas in the standard Kulinkovich conditions it is 20 mol%.18

**Table 12 Reduction of 1a with ethylmagnesium bromide with 2 mol% of Ti(OiPr)4 in ether in the presence of ethyl butyrate**

| N | EtMgBr/  mol. eq. | Time of  stirring | **1a** | **2a** and **3a** | **4a** | Ethyl butyrate | 3-Ethyl­hexan-3-ol |  |
| --- | --- | --- | --- | --- | --- | --- | --- | --- |
| 67 | 0.50 | 10 min | 81 | 19 | 0 | 98 | 1 | 1 |
|  | 1.00 | 10 min | 60 | 40 | 0 | 78 | 14 | 8 |
|  | 2.00 | 10 min | 28 | 72 | 0 | 34 | 39 | 27 |
|  | 3.00 | 10 min | 25 | 75 | 0 | 15 | 52 | 32 |
|  | 4.00 | 10 min | 18 | 82 | 0 | 5 | 58 | 37 |
|  |  | 10 h | 0.1 | 90 | 10 | 0.5 | 58 | 41 |

**I. Preparation and standardisation of Grignard reagents**

**(i)** **Methylmagnesium bromide, ether solution.** Methyl­magnesium bromide (3.0 M solution in ether, Strem, 10 ml) was added to dry ether (20 ml) under argon to obtain a 1.00 M solution.

**(ii)** **Ethylmagnesium bromide, ether solution.** Bromoethane (22.4 ml, 300 mmole) in ether (40 ml) was added to well stirred magnesium (8.8 g, 360 mmole) in ether (220 ml) under argon. Once the reaction began and refluxing occurred, the remainder of the solution was added over 1 h and the reaction mixture was refluxed for a further 1 h to obtain a 1.04 M solution.

**(iii)** ***sec-*Butylmagnesium bromide, ether solution.** A solution of 2-bromobutane (6.85 g, 50 mmole) in ether (5 ml) was added to magnesium (1.46 g, 60 mmole) in ether (40 ml) for 30 m and the mixture was refluxed for a further 30 m. The concentration of the Grignard reagent was 0.80 M.

**(iv) Pentan-3-ylmagnesium bromide, ether solution.** A solution of 3-bromopentane (2.57 g, 17.0 mmole) in ether (2.9 ml) was added to magnesium (0.5 g, 20.4 mmole) in ether (14.1 ml) over 30 m and the reaction mixture was refluxed for further 1 h. The concentration of the Grignard reagent was 0.59 M.

1. ***tert*-Butylmagnesium bromide, ether solution.** (a)A solution of t-butylbromide (6.9 g, 50 mmole) in

dry ether (5 ml) was added to magnesium (1.5 g, 60 mmole) in ether (45 ml) for 30 m and the mixture was refluxed for further 1 h. The concentration of the Grignard reagent was 0.44 M.

(b) A solution of t-butylbromide (20.55 g, 150 mmole) in dry ether (15 ml) was added to magnesium (4.57 g, 188 mmole) in dry ether (60 ml) for 2 h and reaction mixture was stirred for a futher 1 h. The concentration of the Grignard reagent was 1.35 M.

**(vi)** **Phenylmagnesium bromide, ether solution.** Bromobenzene (7.9 g, 50 mmole) in ether (4.5 ml) was added to magnesium (1.5 g, 60 mmole) in ether (45.5 ml) over 30 m and the mixture was refluxed for a further 2 h. The concentration of the Grignard reagent was 1.04 M.

**(vii) Benzylmagnesium bromide, ether solution.** Benzylbromide (17.1 g, 100 mmole) in ether (8 ml) was added to magnesium (2.9 g, 120 mmole) in ether (92 ml) over 40 m. The mixture was refluxed for a further 2 h to give 0.95 M Grignard reagent. If it was quenched with D2O the products contained 87 % toluene, 4.1% benzylalcohol and 8.6 % of bibenzyl by GLC; the toluene was 100 % deuterated by GC/MS.

**(viii)** **Phenethylmagnesium bromide, ether solution.** A 1/10 portion of a solution of phenethyl bromide (18.5 g, 100 mmole) in ether (7 ml) was added to magnesium (2.9 g, 120 mmole) in ether (94 ml) under argon. Once the reaction began and refluxing occurred, the remainder of the solution was added over 40 m; the mixture was refluxed for a further 1.5 h. The concentration of the Grignard reagent was 0.90 M. If it was quenched with D2O, it gave ethylbenzene (92 %), styrene (0.6 %), 1,2-diphenyl-1-methylpropane (**20**) (0.5 %) (see later) and 1,4-diphenylbutane (6.8 %) by GLC. The ethylbenzene was *ca.* 100 % deuterated by GC/MS. None of the other products contained any deuterium by GC/MS.

**(ix)** **3-Deuteriopent-3-ylmagnesium bromide, ether solution (24).** *a) 3-Deuteriopentan-3-ol.* Pentan-3-one (1.29 g, 15.0 mmole) in ether (3 ml) was added with stirring to lithium aluminium deuteride (0.45 g, 10.0 mmole) in ether (20 ml) at -40 C under nitrogen over 10 m. The mixture was warmed to 20 C and after 30 m sat.aq. ammonium chloride (5 ml) was added. The aqueous layer was extracted with ether (2 x 5 ml). The combined organic layers were dried and the solvent was removed to give *3-deuteriopentan-3-ol* (1.18 g, 13.2 mmole, 88 %) which showed H: 0.93 (6H, t, J 7.3 Hz), 1.39 (2H, dqt, J 13.6, 7.3, 1.4 Hz), 1.47 (2H, dqt, J 13.6, 7.3, 1.4 Hz), 1.98 (1H, br.s); C: 9.6-, 29.2+, 73.8 (t, J 21.4 Hz); max: 3359 br.s, 2963 s, 2935 s, 2877 m, 2159 w, 1459 m, 1174 m, 1147 m, 1041 w, 979 m, 965 m, 942 s cm-1.

*b) 3-Bromo-3-deuteriopentane.* A solution of bromine (0.74 ml, 14.3 mmole) in dichloro­methane (2 ml) was slowly added to 1,2-bis(diphenylphosphino)ethane (3.11 g, 7.8 mmole) in dichloromethane (50 ml) at 0 C. 3-Deuteropentan-3-ol (1.08 g, 12.2 mmole) in dichloromethane (5 ml) was added and the mixture was stirred for 2 h at 0 C. Ether (75 ml) was added, the solution was filtered and the solvent was removed to give crude product which was purified by short column chromatography over silica eluting with pentane to yield *3-bromo-3-deuteriopentane* (1.57 g, 10.3 mmole, 84 %), which showed H: 1.04 (6H, t, J 7.3 Hz), 1.85 (4H, q, J 7.3, 1.2 Hz); C: 12.0-, 31.6+, 61.9 (t, J 22.9 Hz); max: 2967 s, 2935 s, 2876 m, 1457 m, 887 m cm-1.

*c) 3-Deuteriopent-3-ylmagnesium bromide.* A solution of 3-bromo-3-deuteriopentane (620 mg, 4.08 mmole) in ether (0.5 ml) was added to magnesium (0.12 g, 5.0 mmole) in ether (4 ml) over 15 m and the mixture was refluxed for a further 30 m. The concentration of the Grignard reagent was 0.54 M.

**(x) 1,1,1,3,3,3-Hexadeuterioprop-2-ylmagnesium bromide, ether solution (25).** 2-Bromo-1,1,1,3,3,3-hexadeuteriopropane (1.94 g, 15.0 mmole) in ether (1.5 ml) was added to magnesium (0.44 g, 18.0 mmole) in ether (12 ml) over 15 m and the mixture was refluxed for 30 m to give 0.75 M Grignard reagent.

**(xi)** **Ethylmagnesium bromide, anisole solution.** Bromoethane (2.73 g, 25.0 mmole) in anisole (3 ml) (distilled over LAH at 40 C) was added to magnesium (0.80 g, 33.0 mmole) in dry anisole (20 ml) over 20 m at 45-50 C and the mixture was stirred for a further 1 h at this temperature to give 0.92 M Grignard reagent.

**(xii)** **Phenethylmagnesium bromide, d3-anisole solution.** *a) d3-Iodomethane***.** d3-Iodomethane was prepared according to a modified literature procedure.68 To a 100 ml three-necked flask were attached a thermometer, an argon inlet, and a 15-cm Vigreux column, which was connected to the distillation head; the receiver flask (10 ml) was cooled with l.nitrogen-alcohol. A l.nitrogen-alcohol trap, N2 inlet, and oil bubbler were linearly connected to the distillation head. The argon inlet was closed and HI (70 ml, 530 mmole of 57 %) and methanol-d4 (5 ml, 123 mmole) were added. Most of iodomethane-d3 produced was distilled while the solution was stirred and heated gradually from 60 to 70 C for 1 h. The temperature was increased to 105 C for 1 h. The remaining product in the solution was collected by sweeping with argon for 30 m. The contents of the flask and l.nitrogen-alcohol trap were combined to give crude iodomethane-d3 (17.35 g, 121 mmole, 98 %, b.p. 39.5-40 C) which was used without purification.

*b) (d3-Me)anisole.* A solution of d3-iodomethane (17.35 g, 121 mmole) in methanol (30 ml) was added to phenol (15.63 g, 166 mmole) and sodium hydroxide (6.15 g, 154 mmole) in methanol (90 ml). The mixture was stirred at 20 C for 12 h and at 65 C for 6 h. A solution of sodium hydroxide (4 g) and sodium sulphite (5 g) in water (450 ml) was added and the water layer was extracted with ether (3 x 100 ml). The combined organic layers were washed with water (2 x 100 ml), dried and evaporated to give crude product (15.14 g) which was dried with sodium wire at 70 C for 14 h and distilled to give (d3-Me)anisole (b.p. 52 C/50 mmHg, 9.50 g, 71 %) which showed H: 7.0 - 7.2 (3H, m), 7.3 - 7.5 (2H, m); C: 54.3 (sept., J 21.8 Hz), 114.0, 120.7, 129.6, 159.7..

*c) Phenethylmagnesium bromide.* Phenethyl bromide (444 mg, 2.4 mmole) was added to magnesium (73 mg, 3.0 mmole) in dry anisole-d3 (2.7 ml) over 10 m at 45 - 50 C and a crystal of iodine was added. The mixture was stirred for a further 3 h at 60 C. The concentration of the Grignard reagent was 0.96 M.

**(xiii)** **Phenethylmagnesium bromide, THF** **solution**. A 1/4 portion of phenethyl bromide (0.55 g, 3.0 mmole) was added to magnesium (0.10 g, 4.0 mmole) in dry THF (2.5 ml) under argon. Once the reaction began, the remainder of the bromide was added over 10 m and the mixture was stirred at 40 C for a further 1 h. The concentration of the Grignard reagent was 1.01 M. A portion of the Grignard reagent was quenched with H2O; the product contained ethylbenzene (95 %), styrene (1 %) and 1,4-diphenylbutane (2 %) by GLC.

**(xiv)** **Phenethylmagnesium bromide, d8-THF solution**. A 1/3 portion of phenethyl bromide (0.21 ml, 1.5 mmole) was added to magnesium (0.05 g, 2.0 mmole) in dry (distilled under LAH) d8-THF (1.2 ml) under argon. Once the reaction began, the remainder of the bromide was added over 10 m and the mixture was stirred at 40 C for a further 1 h. The concentration of the Grignard reagent was 1.0 M. A portion of it was quenched with H2O; the product contained ethylbenzene (94 %), styrene (1 %) and 1,4-diphenylbutane (2 %) by GLC. None of the products contained any deuterium by GC/MS.

**(xv)** **Ethylmagnesium bromide, THF solution.** A solution of bromoethane (17.4 g, 160 mmole) in dry THF (20 ml) was added to well stirred magnesium (4.4 g, 180 mmole) in dry THF (120 ml) under argon. Once the reaction began and refluxing occurred, the remainder of the solution was added over 1 h and the reaction mixture was refluxed for a further 30 m to obtain a 1.02 M solution.

**II. 2-Bromo-1-methyl-1-phenylcyclopropane (2a)/(3a)**

**1(24).** Reaction of 1.0 M ethylmagnesium bromide (13 ml, 13.0 mmole, 1.3 mol.eq.), (**1a**) (2.90 g, 10.0 mmole) and titanium isopropoxide (57 mg, 0.2 mmole, 2 mol.%) in ether (20 ml) as above gave 2-bromo-1-methyl-1-phenylcyclopropane21 (1.98 g, 9.4 mmole, 94 %), as mixture of isomers (**2a**) and (**3a**) in ratio 2:1, which showed i.r. and 1H NMR data in agreement with the literature and C (**2a**): 23.4-, 24.1+, 25.8, 30.6+, 126.6+, 126.9+, 128.6+, 144.5; C (**3a**): 22.2-, 27.1+, 27.7, 28.4+, 126.8+, 128.2+, 129,5+, 142.3.

**2.** Compound (**1a**) (2.90 g, 10.0 mmole) was reduced as above using titanium isopropoxide (0.63 g, 2.2 mmole, 22 mol.%) and 1.0 M ethylmagnesium bromide (13.0 ml, 13.0 mmole,1.3 mol.eq.) to yield (**2a/3a**) (1.94 g, 9.2 mmole, 92 %), identical to that described above.

**3.** Compound (**1a**) (2.90 g, 10.0 mmole) was reduced as above using titanium isopropoxide (57 mg, 0.2 mmole, 2 mol.%) and 1.0 M ethylmagnesium bromide (13.0 ml, 13.0 mmole, 1.3 mol.eq.) but instead of purification by silica chromatography the product was distilled at 4 mmHg at 57 - 60 C to give (**2a/3a**) (1.94 g, 9.2 mmole, 92 %), identical to that described above.

**4.** Compound (**1a**) (2.90 g, 10.0 mmole) was reduced by the standard procedure using titanium isopropoxide (14 mg, 0.05 mmole, 0.5 mol.%) and 1.0 M ethylmagnesium bromide (13.0 ml, 13.0 mmole, 1.3 mol.eq.) to yield a mixture of (**1a**) and (**2a/3a**) in ratio 81:19 (by 1H NMR).

Compound (**1a**) (2.90 g, 10.0 mmole) was reduced as above, the mixture was quenched with D2O, to yield (**2a/3a**) (1.98 g, 9.4 mmole, 94 %), which showed no deuterium incorporation by 1H, 13C NMR and by MS and which was identical to that described above.

**5(25). 1-Methyl-1-phenylcyclopropane (4a).** Compound (**1a**) (2.90 g, 10.0 mmole) was reduced as above using titanium isopropoxide (284 mg, 1.0 mmole, 10 mol.%) and 1.0 M ethylmagnesium bromide (30.0 ml, 30.0 mmole, 3.0 mol.eq.) with a total addition time of 1 h and stirring time of 30 m to yield 1-methyl-1-phenylcyclopropane (**4a**)63 (1.23 g, 9.3 mmole, 93 %) which showed H: 0.70 (2H, m), 0.93 (2H, m), 1.35 (3H, s), 7.06 - 7.27 (5H, m); C: 15.7-, 19.8, 25.8+, 125.5+, 126.8+, 128.2+, 147.1.

**6.** **1-Bromo-2-phenylcyclopropane (2b)/(3b).** (i) 1,1-Dibromo-2-phenylcyclopropane (**1b**) (2.76 g, 10.0 mmole) was reduced as above using titanium isopropoxide (57 mg, 0.2 mmole, 2 mol.%) and 1.0 M ethylmagnesium bromide (12.5 ml, 12.5 mmole, 1.25 mol.eq.) with a total addition time of 12 m and stirring time of 20 m to yield 1-bromo-2-phenylcyclopropane65 (1.77 g, 9.0 mmole, 90 %) as a mixture of isomers (**2b**) and (**3b**) in ratio 1:1.1 which showed H: 1.25 - 1.60 (2H, m), 2.20 - 2.40 (1H, m), 3.01 (1H, m), 3.25 m (1H, m), 6.95 - 7.40 (5H, m); C: 14.3-, 19.0-, 21.8+, 22.2+, 24.2+, 27.0+, 126.0+, 126.6+, 126.9+, 128.0+, 128.6+, 129.3+, 137.2, 139.9.

(ii) 1.0 M Ethylmagnesium bromide (3.4 ml, 3.4 mmole, 1.7 mol.eq.) was added over 22 m to a solution of (**1b**) (0.55 g, 2.0 mmole) and titanium trichloride (0.20 ml of 1M solution in dichloromethane-THF, 2:1; 0.2 mmole, 10 mol.%) in ether (5 ml) under nitrogen. Stirring was continued for 30 m at 20 C when water (2 ml) was added carefully; work up as above gave (**2b**) and (**3b**) in ratio 1:1.1 (0.35 g, 1.76 mmole, 88 %).

**7.** **1-Bromo-2,2-dimethylcyclopropane (2c).** 1,1-Dibromo-2,2-dimethylcyclopropane (**1c**) (11.4 g, 50.0 mmole) was reduced as above using titanium isopropoxide (0.71 g, 2.5 mmole, 5 mol.%) and 1.0 M ethyl magnesium bromide (65.0 ml, 65.0 mmole, 1.3 mol.eq.) with a total addition time of 30 m and stirring time of 20 m to yield 1-bromo-2,2-dimethylcyclopropane66 (6.3 g, 42.5 mmole, 85 %) which showed H: 0.65 (1H, dd, J 6.1, 4.2 Hz), 0.96 (1H, dd, J 7.6, 6.1 Hz), 1.13 (3H, s), 1.27 (3H, s), 2.83 (1H, dd, J 7.6, 4.2, Hz); C: 17.4, 22.7+, 23.1-, 24.8+, 30.4+.

**8.** **7-Bromobicyclo[4.1.0]heptane (2d)/(3d).** 7,7-Dibromobicyclo[4.1.0]heptane (**1d**) (2.54 g, 10.0 mmole) was reduced as above using titanium isopropoxide (57 mg, 0.2 mmole, 2 mol.%) and 1.0 M ethylmagnesium bromide (14.0 ml, 14.0 mmole, 1.4 mol.eq.) with a total addition time of 25 m and stirring time of 20 m to yield 7-bromobicyclo[4.1.0]heptane64 (1.58 g, 9.0 mmole, 90 %) as a mixture of isomers (**2d**) and (**3d**) in ratio 1:3.8 which showed H: 0.80 - 2.00 (8H, m), 2.60 (1H2d, t, J 3.5 Hz), 3.28 (1H3d, t, J 7.8 Hz); C (**3d**): 12.0-, 19.9+, 21.3+, 33.8-; C (**2d**): 20.9+, 21.2-, 22.5+, 25.7-.

**9.** **9-Bromobicyclo[6.1.0]nonane (2e)/(3e).** 1.26 M Ethylmagnesium bromide in ether (15.9 ml‚ 20.0 mmole, 1.0 mol.eq.) was added to 9,9-dibromobicyclo[6.1.0]nonane (**1e**) (5.64 g, 20.0 mmole) and titanium isopropoxide (113.7 mg, 0.4 mmole, 2 mol.%) in ether (40 ml) over 20 m. After 50 m, further Grignard reagent (6.4 ml, 8.0 mmole, 0.4 mol.eq.) was added, followed after 30 m by more (1.6 ml, 2.0 mmole, 0.1 mol.eq.). The mixture was quenched after 10 m by dropwise addition of water (5 ml) followed by 15% aq. sulfuric acid (3 ml) and the water layer was extracted with ether (3  5 ml) and worked up as before to give 9-bromo-bicyclo[6.1.0]nonane (**2e**)/(**3e**)4a in ratio 1:2.5 by GLC and 1H NMR (3.9 g, 96 %) which showed H: 0.75-1.1 (2 H, m), 1.10-1.73 (10 H, m), 1.73 - 1.87 (2 H3e, m), 2.10-2.25 (2 H2e, m), 2.33 (1 H2e, t, J 3.5 Hz), 3.25 (1 H3e, t, J 7.5 Hz); C: 19.0+, 24.1-, 24.2+, 25.5-, 26.3-‚ 26.7-, 26.8+, 28.8-, 28.8-, 30.7+.

**10. 2-Bromo-1-hexylcyclopropane (2f/3f):** 1.03 M Ethylmagnesium bromide in ether (11.7 ml, 12.0 mmole, 1.2 mol.eq.) was added to 1,1-dibromo-2-hexylcyclopropane (**1f**) (2.84 g, 10.0 mmole) and titanium isopropoxide (142 mg, 0.5 mmole, 5 mol.%) in ether (20 ml) over 20 m. After 25 min, futher Grignard reagent (1.95 ml, 2.0 mmole, 0.2 mol.eq.) was added, followed after 25 min by more (0.6 ml, 0.5 mmole, 0.05 mol.eq.). The mixture was quenched after 20 m by dropwise addition of water (3 ml) followed by 5% aq. hydrochloric acid (4 ml) and the water layer extracted with ether (3x10 ml) and worked up as above to give 2-bromo-1-hexylcyclopropane (**2f/3f**)71 in ratio 1:1.7 by GLC and 1H NMR (1.99 g, 97 %) which showed H: 0.50 (1 H3f, ddd, J 6.6, 6.3, 4.3 Hz), 0.60-0.80 (1 H2f, m), 0.83-1.02 (3 H, m), 1.12-1.55 (12 H, m), 2.59 (1 H2f, ddd, J 6.7, 3.6, 3.1 Hz), 3.05 (1 H3f, ddd, J 7.3, 7.3, 4.3 Hz); H: 14.1+, 15.0-, 15.9-, 16.8+, 20.0+, 22.7-, 22.9+, 24.0+, 28.7-, 29.0-, 29.1-, 31.1-, 31.8-, 32.8-.

**11.** **1,2-Dibromo-1-n-octylcyclopropane (2g)/(3g).** 1,1,2-Tribromo-2-n-octylcyclopropane (**1g**) (1.96 g, 5.0 mmole) was reduced as above using titanium isopropoxide (142 mg, 0.5 mmole, 10 mol.%) and 1.0 M ethylmagnesium bromide (5.0 ml, 5.0 mmole, 1.0 mol.eq.) with an addition time of 10 m and stirring time of 10 m to yield 1,2-dibromo-1-n-octylcyclopropane23 (1.49 g, 4.8 mmole, 96 %) as mixture of isomers (**2g**)/(**3g**) in ratio 3.5:1 which showed H: 0.92 (3H, dd, J 7.3, 7.3 Hz), 1.12 (1H2g, dd, J 8.0, 5.4 Hz), 1.22 - 1.97 (15H + 1H3g, m), 2.83 (1H3g, dd, J 8.5, 5.6 Hz), 3.54 (1H2g, dd, J 8.7, 5.4 Hz); C (**2g**): 14.1+, 22.7-, 26.4-, 27.4-, 28.6+, 29.0-, 29.2-, 29.5-, 31.9-, 36.9, 38.8-; max: 3059 w, 2954 s, 2925 s, 2854 s, 1465 m cm-1.

**12.** **1,2-Dibromo-1-n-butylcyclopropane (2h)/(3h).** 1,1,2-Tribromo-2-n-butylcyclopropane (**1h**) (1.67 g, 5.0 mmole) was reduced as above using titanium isopropoxide (28 mg, 0.1 mmole, 2 mol.%) and 1.0 M ethylmagnesium bromide (5.0 ml, 5.0 mmole, 1.0 mol.eq.) with an addition time of 10 m and stirring time of 10 m to yield 1,2-dibromo-1-n-butylcyclopropane23 (1.22 g, 4.75 mmole, 95 %) as mixture of isomers (**2h**)/(**3h**) in ratio 3.5:1 which showed H: 0.96 (3H, dd, J 7.4, 7.4 Hz), 1.09 (1H2h, dd, J 8.0, 5.4 Hz), 1.25 - 1.98 (7H + 1H3h, m), 2.82 (1H3h, dd, J 8.6, 5.7 Hz), 3.52 (1H2h, dd, J 8.7, 5.4 Hz); C (**2h**): 14.1+, 22.1-, 26.3-, 28.6+, 29.5-, 36.9, 38.6-; C (**3h**): 14.1+, 22.0-, 26.0-, 28.6+, 29.7-, 41.0, 41.5-; max: 3060 w, 2957 s, 2934 s, 2871 m, 2860 m, 1465 m, 1210 w, 1142 m, 1040 m cm-1.

**13.** **1,1,2-Tribromo-3,3-dimethylcyclopropane (2i).** 1,1,2,2-Tetrabromo-3,3-dimethylcyclopropane (**1i**) (385 mg, 1.0 mmole) was reduced as above using titanium isopropoxide (28 mg, 0.1 mmole, 10 mol.%) and 1.0 M ethylmagnesium bromide (1.0 ml, 1.0 mmole, 1.0 mol.eq.) with an addition time of 10 m and stirring time of 10 m to yield 1,1,2-tribromo-3,3-dimethylcyclopropane **(2i)** (282 mg, 0.92 mmole, 92 %) which showed i.r., 1H and 13C NMR data identical to those reported.69

1. **Mechanistic investigations**

**Reduction of (1d) with MeMgBr in ether-thf-toluene**

7,7-Dibromobicyclo[4.1.0]heptane (**1d**) (0.51 g, 2.0 mmole) was reduced by the standard procedure using titanium isopropoxide (57 mg, 0.2 mmole, 10 mol.%) and 1.4 M methylmagnesium bromide in thf-toluene (1:3, Aldrich, 1.43 ml, 2.0 mol.eq.) with a total addition time of 20 m and stirring time of 18 h to yield a mixture of (**1d**) and (**2d**)/(**3d**) 64 in ratio 22:77 by GLC (3.5:1 ratio of *endo*- and *exo*- by 1H NMR).

**Reactions of (1a) with methylmagnesium bromide**

**14.** **With 1.3 mol.eq. of Grignard reagent without catalyst.** (a) A solution of the 1.0 M Grignard reagent (6.5 ml, 6.5 mmole, 1.3 mol.eq.) was added to (**1a**) (1.45 g, 5.0 mmole) in dry ether (10 ml) over 10 m. GLC showed the presence of the following compounds: (**1a**):(**2a**)+(**3a**):(**4a**), %: 0 m 85:15:0, 2 m 82:18:0, 5 m 75:25:0, 10 m 67:33:0, 20 m 59:41:0, 1 h 41:58:1, 2 h 38:61:1, 4 h 25:74:1, 8 h 20:79:1, 24 h 13:85:2. After standard work up the crude product showed in the 1H NMR (**1a**) 15 %, (**2a**)+(**3a**) 85% (2.4:1).

(b) **With 2 mol.% of catalyst** The 1.0 M Grignard reagent (6.5 ml, 6.5 mmole, 1.3 mol.eq.) was added to (**1a**) (1.45 g, 5.0 mmole) and titanium isopropoxide (28 mg, 0.1 mmole, 2 mol.%) in ether (10 ml) over 10 m. GLC showed the following ratios: (**1a**):(**2a**)+(**3a**):(**4a**), %: 0 m 90:10:0, 2 m 86:14:0, 5 m 77:23:0, 10 m 71:29:0, 20 m 56:43:1, 1 h 28:71:1, 2 h 17:82:1, 4 h 5:94:2, 8 h 2:96:2, 24 h 1:95:4. After standard work up the crude product showed in the 1H NMR (**1a**) 1 %, (**2a**)+(**3a**) 96 % (2.2:1), (**4a**) 3 %.

1. **With 10 mol.% of catalyst.** (a)Reaction (14 b) was repeated using titanium isopropoxide (142 mg, 0.5 mmole, 10 mol.%). GLC showed the following ratios: (**1a**):(**2a**)+(**3a**):(**4a**), %: 0 m 78:22:0, 2 m 74:26:0, 5 m 67:33:0, 10 m 50:50:0, 20 m 43:57:1, 1 h 21:79:0, 2 h 12:88:1, 4 h 7:91:2, 8 h 5:93:2, 24 h 5:93:2. After standard work up the crude product showed in the 1H NMR (**1a**) 6 %, (**2a**)+(**3a**) 94 % (2.3:1).

(b) **With 0.2 mol.eq. of EtMgBr plus 1.1 mol.eq. of MeMgBr and 10 mol.% of catalyst.** 1.0 M EtMgBr (1.0 ml, 1.0 mmole, 0.2 mol.eq.) was added to (**1a**) (1.45 g, 5.0 mmole) and titanium isopropoxide (142 mg, 0.5 mmole, 10 mol.%) in dry ether (10 ml) over 2 m. Then a solution of the 1.0 M MeMgBr (5.5 ml, 5.5 mmole, 1.1 mol.eq.) was added. GLC showed the presence of: (**1a**):(**2a**)+(**3a**):(**4a**), %: 0 m 38:61:1, 2 m 33:66:1, 5 m 26:73:1, 10 m 19:79:2, 20 m 9:89:2, 1 h 2:96:2, 2 h 0:97:3, 4 h 0:97:3, 8 h 0:97:3, 24 h 0:97:3. After standard work up the crude product showed in the 1H NMR (**4a**) 3 %, (**2a**)+(**3a**) 97 % (2.2:1).

**Reactions of (1a) with ethylmagnesium bromide**

**15.** **With 1.3 mol.eq. of Grignard reagent without catalyst.** The reaction was carried out as in 14(a) except that a 1.0 M solution of ethyl magnesium bromide in ether (6.5 ml, 6.5 mmole, 1.3 mol.eq.) was used. GLC showed the presence of the following compounds: (**1a**):(**2a**)+(**3a**):(**6**), %: 0 m 98:1:1, 2 m 98:1:1, 5 m 96:2:2, 10 m 65:2:3, 20 m 93:3:4, 1 h 88:5:7, 2 h 86:5:9, 4 h 78:9:13, 8 h 57:9:34, 24 h 44:10:46. After standard work up the crude product showed in the 1H NMR (**1a**) 57 %, (**2a**)+(**3a**) 9 % (1.6:1), (**6**) 34 %.

**In the presence of 2 mol.% of catalyst.** The 1.0 M Grignard reagent (6.5 ml, 6.5 mmole, 1.3 mol.eq.) was added to (**1a**) (1.45 g, 5.0 mmole) and titanium isopropoxide (28 mg, 0.1 mmole, 2 mol.%) in ether (10 ml) over 10 m. GLC showed the presence of the following: (**1a**):(**2a**)+(**3a**):(**4a**), %: 0 m 0.5:98:1.5, 2 m 0:98:2, 5 m 0:98:2, 10 m 0:96:4, 20 m 0:93:7, 1 h 0:90:10, 24 h 0:73:27. After standard work up the crude product showed in 1H NMR (**2a**)+(**3a**) 78 % (2.0:1), (**4a**) 22 %.

**Reactions of (1a) with *sec*-butylmagnesium bromide**

**16. Without catalyst.** A 0.80 M solution of the Grignard reagent (1.25 ml, 1.0 mmole, 1.0 mol.eq.) was added to (**1a**) (290 mg, 1.0 mmole) in ether (2 ml) over 10 m. The products on quenching samples after 30 m and 2 h are given in Table 3, entry 16. Further Grignard reagent (1.25 ml, 1.0 mmole, 1.0 mol.eq.) was added. After 1 h, the mixture was quenched by dropwise addition of water (1 ml) followed by 15 % aq. sulfuric acid (1 ml) and the products worked up as above.

**26. 2-Bromo-1-methyl-1-phenylcyclopropane.** Compound (**1a**) (1.45 g, 5.0 mmole) was reduced by the standard procedure using titanium isopropoxide (70 mg, 0.25 mmole, 5 mol.%) and 0.80 M but-2-ylmagnesium bromide (6.5 ml, 5.2 mmole, 1.04 mol.eq.) over 1 h to yield 1:2 (**3a**)/(**2a**) (1.03 g, 4.88 mmole, 97 %), identical to that above.

**27. 1-Methyl-1-phenylcyclopropane.** Compound (**1a**) (1.45 g, 5.0 mmole) was reduced as above using titanium isopropoxide (142 mg, 0.5 mmole, 10 mol.%) and 0.80 M but-2-ylmagnesium bromide (16.5 ml, 13.2 mmole, 2.64 mol.eq.) for 1 h to yield 1-methyl-1-phenylcyclopropane (0.62 g, 4.77 mmole, 95 %) which was identical to that above.

**Reactions of (1a) with 3-pentylmagnesium bromide**

**17.** **With 1 mol.eq. of Grignard reagent without catalyst.** A 0.59 M solution of the Grignard reagent (0.85 ml, 0.5 mmole, 1.0 mol.eq.) was added to (**1a**) (145 mg, 0.5 mmole) in ether (1 ml). The mixture was quenched after 18 h by dropwise addition of D2O (1 ml) followed work-up as in 16 to give a crude product which contained by 1H NMR 11 % (**2a**) and 7 % (**3a**), 43 % (**1a**), 39 % (**6**) and other products.

**28.** **With 1.3 mol.eq. of Grignard reagent in the presence of 2 mol.% of catalyst.** A 0.59 M solution of the Grignard reagent (2.2 ml, 1.3 mmole, 1.3 mol.eq.) was added to (**1a**) (290 mg, 1.0 mmole) and titanium isopropoxide (5.7 mg, 0.02 mmole, 2 mol.%) in dry ether (2 ml) over 10 m. The mixture was quenched after 40 h by dropwise addition of D2O (1 ml). Work-up as above gave a crude product, which contained by 1H NMR 29 % (**2a**), 20 % (**3a**), 33 % (**1a**) and 18 % (**6**) and other products.

**29.** **With 1.3 mol.eq. of Grignard reagent and 10 mol.% of catalyst.** A 0.59 M solution of the Grignard reagent (3.4 ml, 2.0 mmole, 1.0 mol.eq.) was added to (**1a**) (580 mg, 2.0 mmole) and titanium isopropoxide (57 mg, 0.2 mmole, 10 mol.%) in ether (2 ml) over 10 m. After 30 m, further Grignard reagent (0.83 ml, 0.5 mmole, 0.25 mol.eq.) was added over 10 m, followed after 30 m by more (0.17 ml, 0.1 mmole, 0.05 mol.eq.). The mixture was quenched after 10 m by dropwise addition of D2O (1 ml) followed by 15 % aq. sulfuric acid (1 ml) and the water layer was extracted with ether (2 x 2 ml). The combined ether layers were dried and evaporated to give crude product, which contained by 1H NMR 67 % (**2a**), 33 % (**3a**) and other products.

**30.** **With 4 mol.eq. of Grignard reagent and 10 mol.% of catalyst.** A 0.59 M solution of the Grignard reagent (2.26 ml, 1.34 mmole, 2.0 mol.eq.) was added to (**1a**) (193 mg, 0.67 mmole) and titanium isopropoxide (19 mg, 0.067 mmole, 10 mol.%) in ether (1.34 ml) over 15 m. After 1.5 h, further Grignard reagent (1.13 ml, 0.67 mmole, 1.0 mol.eq.) was added, followed after 17 h by more (1.13 ml, 0.67 mmole, 1.0 mol.eq.). The mixture was quenched after 42 h by dropwise addition of D2O (2 ml); work-up as above gave a crude product, which showed no (**2a**)/(**3a**) and the presence of (**4a**) by 1H NMR.

**Reactions of (1a) with t-butylmagnesium bromide**

**18. With 2 mol.eq. of Grignard without catalyst.** A 0.44 M solution of the Grignard reagent (2.3 ml, 1.0 mmole, 1.0 mol.eq.) was added to (**1a**) (290 mg, 1.0 mmole) in dry ether (2 ml). After 16 h, further Grignard reagent (2.3 ml, 1.0 mmole, 1.0 mol.eq.) was added. The mixture was quenched after 8 h by dropwise addition of D2O (1 ml). Work-up as above gave a crude product (186 mg) which contained by 1H NMR 14 % 2,2,3,3-tetramethylbutane, 46 % (**2a**), 28 % (**3a**) and 36 % (**1a**).

**19. With 4 mol.eq. of Grignard without catalyst.** A 1.2 M solution of the Grignard reagent (33.5 ml, 40.0 mmole, 4.0 mol.eq.) was added to (**1a**) (2.9 g, 10.0 mmole) (without solvent). The mixture was quenched after 72 h by dropwise addition of water (4 ml). Work up as above gave crude product, which contained by 1H NMR 63 % (**2a**), 37 % (**3a**), <1 % (**1a**) and <1 % (**6**). Further distillation gave mixture of (**2a**) and (**3a**) (1.68 g, 8.0 mmole, 80 %).

**31.** **With 2 mol.eq. of Grignard and 10 mol.% of catalyst.** A 0.44 M solution of the Grignard reagent (4.5 ml, 2.0 mmole, 1.0 mol.eq.) was added to (**1a**) (580 mg, 2.0 mmole) and titanium isopropoxide (56.9 mg, 0.2 mmole, 10 mol.%) in ether (4 ml) for 15 m. After 4 h, further Grignard reagent (4.5 ml, 2.0 mmole, 1.0 mol.eq.) was added. The mixture was quenched after 14 h by dropwise addition of D2O (1 ml); work up as above gave crude product (446 mg) which contained by 1H NMR 13 % 2,2,3,3-tetramethylbutane, 63 %(**2a**), 34 % (**3a**) and 3 % (**1a**).

**Reactions of (1a) with phenylmagnesium bromide**

**20.** **With 1 mol.eq. of Grignard without catalyst.** A 1.04 M solution of the Grignard reagent (2.9 ml, 3.0 mmole, 1.0 mol.eq.) was added to (**1a**) (870 mg, 3.0 mmole) in ether (6 ml). The mixture was quenched after 26 h by dropwise addition of D2O (1 ml). Work-up as above gave crude product (889 mg) which contained by 1H NMR 74 % (**1a**), 18 % (**2a**), 8 % (**3a**) and 17 % 1-ethoxy-1-phenylethane.

**32(61).With 1.5 mol.eq. of Grignard and 2 mol.% of catalyst:** A 1.04 M solution of the Grignard reagent (2.9 ml, 3.0 mmole, 1.0 mol.eq.) was added to (**1a**) (870 mg, 3.0 mmole) and titanium isopropoxide (17 mg, 0.06 mmole, 2 mol.%) in ether (6 ml) for 10 m. After 30 m, further Grignard reagent (1.5 ml, 1.5 mmole, 0.5 mol.eq.) was added. The mixture was quenched after 20 m by dropwise addition of D2O (1 ml). Work-up as above gave crude product (1.09 g) which contained by 1H NMR 72 % (**2a**), 28 % (**3a**) and 83 % 1-ethoxy-1-phenylethane.

**With 10 mol.% of catalyst.** Reaction 32 was repeated using titanium isopropoxide (85.3 mg, 0.30 mmole, 10 mol.%). After 30 m. further Grignard reagent (1.5 ml, 1.5 mmole, 0.5 mol.eq.) was added. The mixture was quenched after 10 m by dropwise addition of D2O (1 ml) and worked up as above to give crude product (1.17 g). Chromatography of 0.5 g on silica (5 g) eluting with petroleum gave a mixture of (**2a**) and (**3a**) (237 mg, 87 %, 2.5:1 by NMR) and 1-phenyl-1-ethoxyethane (179 mg) which was identical by 1H NMR, i.r. and MS to the literature,73 and showed C: 15.5+, 24.3+, 63.9-, 77.8+, 126.1+, 127.3+, 128.4+, 144.3.

**33(62).** **With 4 mol.eq. of Grignard and 10 mol.% of catalyst.** A 1.04 M solution of the Grignard reagent (5.8 ml, 6.0 mmole, 2.0 mol.eq.) was added to (**1a**) (870 mg, 3.0 mmole) and titanium isopropoxide (85.3 mg, 0.3 mmole, 10 mol.%) in ether (6 ml) for 15 m. After 1 and 2 h, further Grignard reagent (2 x 2.9 ml) was added. The mixture was quenched after 14 h by dropwise addition of D2O (2 ml). Work-up as above gave crude product (1.16 g). Chromatography of 0.5 g on silica (30 g) eluting with petroleum gave (**4a**) (122 mg, 71 %), biphenyl (171 mg), identical by 1H NMR and i.r. to an authentic sample and 1-phenyl-1-ethoxyethane (202 mg).

**With 1.5 mol.eq. of Grignard and 8 mol.% of titanium tetrachloride.** A 1.04 M solution of the Grignard reagent (0.97 ml, 1.0 mmole, 1.0 mol.eq.) was added to (**1a**) (290 mg, 1.0 mmole) and titanium tetrachloride (15.2 mg, 0.08 mmole, 8 mol.%) in ether (2 ml) over 10 m. After 30 m, further Grignard reagent (0.49 ml, 0.5 mmole, 0.5 mol.eq.) was added. The mixture was quenched after 10 m by dropwise addition of D2O (1 ml) and worked up as above to give a crude product which contained by 1H NMR 71 % (**2a**) and 29 % (**3a**), 3 % (**1a**) and 79 % 1-phenyl-1-ethoxyethane.

**Reactions of (1a) with benzylmagnesium bromide**

**21(39).**  **With 1 mol.eq. of Grignard reagent without catalyst.** A 0.95 M solution of the Grignard reagent (1.05 ml, 1.0 mmole, 1.0 mol.eq.) was added (**1a**) (290 mg, 1.0 mmole) in ether (2 ml) over 2 m. The products on quenching samples after 10 m, 30 m and 1 h are given in Table 3, entry 19. After 18 h, the mixture was quenched by dropwise addition of water (1 ml) followed by 15 % aq. sulfuric acid (1 ml). Work up as above gave a crude product, which by 1H NMR contained bibenzyl83 (15 %), toluene (28 %) (**2a**) (14 %) and (**3a**) (8 %) and (**1a**) (78 %) and (**11**)53,54,77,79 (12 %).

**34(38, 60).** **With 10 mol.% of catalyst.** A 0.95 M solution of the Grignard reagent (1.05 ml, 1.0 mmole, 1.0 mol.eq.) was added to (**1a**) (290 mg, 1.0 mmole) and titanium isopropoxide (28.4 mg, 0.1 mmole, 10 mol.%) in ether (2 ml) over 15 m. After 18 h, quenching and work-up as above gave a crude product which showed in the 1H NMR spectrum 15 % of bibenzyl, 27 % of toluene, 27 % (**2a**) and 15 % (**3a**) and 58 % (**1a**) and (**11**) (20 %).

**37(59).With 5 mol.eq. of Grignard and 22 mol.% of catalyst.** A 0.95 M solution of the Grignard reagent (5.25 ml, 5.0 mmole, 5.0 mol.eq.) was added to (**1a**) (290 mg, 1.0 mmole) and titanium isopropoxide (62.3 mg, 0.22 mmole, 22 mol.%) in ether (2 ml) over 8 m. After 38 h, quenching and work-up as above gave a crude product (404 mg) which showed in the 1H NMR spectrum 57 % (**12**), 133 % of toluene, 57 % (**2a**), 31 (**3a**) and 12 % (**4a**) and (**11**) (64 %). Chromatography of 0.2 g on silica (8 g) eluting with petroleum gave (**2a/3a**), (**12**) (24 mg) which showed H: 2.96 (4H, s), 7.12 - 7.39 (10H, m); C: 38.0-, 126.0+, 128.4+, 128.5+, 141.8 and (**11**) (35 mg) which showed H: 1.13 (3H, d, J 6.1 Hz), 1.16 (3H, t, J 7.0 Hz), 2.61 (1H, dd, J 13.4, 6.8 Hz), 2.91 (1H, dd, J 13.4, 6.2 Hz), 3.42 (1H, dq, J 9.2, 7.0 Hz), 3.52 (1H, dq, J 9.2, 7.0 Hz), 3.58 (1H, ddq, J 6.8, 6.2, 6.1 Hz), 6.98 – 7.37 (5H, m); C: 15.4+, 19.5+, 43.0-, 63.8-, 76.3+, 125.9+, 128.2+, 129.3+, 139.1.

**Reactions of (1a) with phenethylmagnesium bromide**

**22(40). With 2 mol.eq. of Grignard without catalyst.** A 0.90 M solution of the Grignard reagent (3.3 ml, 3.0 mmole, 1.0 mol.eq.) was added to (**1a**) (870 mg, 3.0 mmole) in ether (6 ml). After 51 h, further Grignard reagent (3.1 ml, 3.0 mmole, 1.0 mol.eq.) was added. The mixture was quenched after 24 h with water (2 ml); work up as above gave a crude product which by 1H NMR contained 7 % styrene, 13 % (**6**), 19 % phenethyl bromide, 17 % (**2a**), 6 % (**3a**), 64 % (**1a**) and 166 % ethylbenzene.

**35(42, 56).** **With 1.3 mol.eq. of Grignard and 2 mol.% of catalyst.** A 0.90 M solution of the Grignard reagent (5.1 ml, 5.0 mmole, 1.0 mol.eq.) was added to (**1a**) (1.45 g, 5.0 mmole) and titanium isopropoxide (28.4 mg, 0.1 mmole, 2 mol.%) in ether (10 ml) over 15 m. After 30 m, further Grignard reagent (1.3 ml, 1.25 mmole, 0.25 mol.eq.) was added, followed after 30 m by further reagent (0.2 ml, 0.25 mmole, 0.05 mol.eq.). The mixture was quenched after 10 m by dropwise addition of D2O (1 ml) and the water layer was extracted with ether (2 x 3 ml). The combined ether layers were dried and evaporated to give crude product (2.27 g). Chromatography of this (1.00 g) on silica (30 g) eluting with petroleum gave (**2a**) (210 mg, 45 %) and (**3a**) (79 mg, 17 %);1,4-diphenylbutane (18) (26 mg), identical by 1H NMR, MS and i.r. to authentic material75and 3-ethoxy-1-phenylbutane77 (129 mg) which showed H: 1.14 (3H, d, J 6.2 Hz), 1.18 (3H, t, J 7.0 Hz), 1.70 (1H, dddd, J 13.5, 9.5, 6.9, 5.2 Hz), 1.79 (1H, dddd, J 13.5, 9.3, 7.4, 6.0 Hz), 2.64 (1H, ddd, J 13.8, 9.3, 6.9 Hz), 2.69 (1H, ddd, J 13.8, 9.5, 6.0 Hz), 3.38 (1H, dqd, J 7.4, 6.3, 5.2 Hz), 3.39 (1H, dq, J 9.1, 7.0 Hz), 3.51 (1H, dq, J 9.1, 7.0 Hz), 7.11 – 7.27 (5H, m); C: 15.7+, 19.8+, 31.9-, 38.5-, 63.6-, 74.3+, 125.7+, 128.3+, 128.5+, 142.5; GC/MS: 178 (1), 133 (11), 132 (100), 117 (86), 105 (2), 91 (58), 77 (6), 73 (47), 65 (8); max.: 3084 w, 3062 m, 3026 m, 2972 s, 2928 s, 2867 s, 1603 m, 1495 m, 1454 m, 1372 m, 1339 m, 1137 s, 1095 s, 746 m, 699 s.

**36(43).** **With 5 mol.eq. of Grignard and 10 mol.% of catalyst** **.** A 0.90 M solution of the Grignard reagent (3.1 ml, 3.0 mmole, 1.0 mol.eq.) was added to (**1a**) (870 mg, 3.0 mmole) and titanium isopropoxide (85.3 mg, 0.3 mmole, 10 mol.%) in ether (6 ml) over 10 m. After 15 m, a solution of the Grignard reagent (3.1 ml, 3.0 mmole, 1.0 mol.eq.) was added. After 1.5 h, further Grignard reagent (3.1 ml, 3.0 mmole, 1.0 mol.eq.) was added, followed after 5 h and 12 h by further reagent (3.1 ml, 3.0 mmole, 1.0 mol.eq.; 3.1 ml, 3.0 mmole, 1.0 mol.eq.). The mixture was quenched after 24 h by dropwise addition of D2O (2 ml) and the water layer was extracted with ether (2x3 ml). The combined ether layers were dried and evaporated to give crude product (907 mg) which contained by 1H NMR (**4a**) and no (**2a**) or (**3a**); by GC/MS, the ratio of deuterated ethylbenzene to nondeuterated ethylbenzene was 62 to 38.

**Reduction of (1a) with 1.3 mol.eq. of phenethylmagnesium bromide in presence of 2 mol.% of titanium isopropoxide.** A 0.80 M solution of the Grignard reagent (2.16 ml, 1.7 mmole, 1.3 mol.eq.) was added to (**1a**) (377 mg, 1.3 mmole) and titanium isopropoxide (7 mg, 0.026 mmole, 2 mol.%) in ether (2.6 ml) over 10 m. The mixture was quenched after 10 m by dropwise addition of water (1 ml) and worked up as above to give crude product (590 mg) which contained styrene, ethylbenzene, (**2a**) and (**3a**) (11:100:69:31) by 1H NMR.

**41.Reduction of (1a) with 0.80 mol.eq. of phenethylmagnesium bromide in presence of 2 mol.% of titanium isopropoxide with following separation of layers.** A 0.97 M solution of the Grignard reagent (2.4 ml, 2.4 mmole, 0.80 mol.eq.) was added to (**1a**) (870 mg, 3.0 mmole) and titanium isopropoxide (17 mg, 0.06 mmole, 2 mol.%) in ether (6 ml) over 10 m. The formation of two laters was observed after 5 min. These layers were separated and quenched by dropwise addition of D2O (2 ml). Quenched upper layer was worked up as above to give crude product which contained styrene, ethylbenzene, (**1a**), (**2a**) and (**3a**) (2:64:29:48:24) by 1H NMR. D2O from this layer contained only ether by 1H NMR. The bottom later contained ether and trace of phenethyl alcohol by 1H NMR in D2O.

**44(58). Reduction of 2-bromo-1-methyl-1-phenylcyclopropane with phenethylmagnesium bromide and 10 mol.% titanium isopropoxide.** A 0.98 M solution of the Grignard reagent (4.1 ml, 4.0 mmole, 2.0 mol.eq.) was added to 2-bromo-1-methyl-1-phenylcyclopropane (422 mg, 2.0 mmole) and titanium isopropoxide (56.8 mg, 0.2 mmole, 10 mol.%) in dry ether (4 ml) over 15 m. After 2 h, more Grignard reagent (3.1 ml, 3.0 mmole, 1.0 mol.eq.) was added. The reaction mixture was quenched after 20 h by dropwise addition of D2O (2 ml) and the water layer was extracted with ether (2 x 2 ml). The combined ether layers were dried and evaporated to give a liquid which contained styrene, ethylbenzene, 1-methyl-1-phenylcyclopropane, 1,4-diphenylbutane (29:290:100:25) by 1H NMR. The ethylbenzene was 63% monodeuterated by GC/MS.

**45 – 48. Reaction of phenethylmagnesium bromide in ether for 84 h with titanium isopropoxide.**

(a) A 1.08 M solution of phenethylmagnesium bromide (6.7 ml‚ 7.2 mmole) was added to ether (7 ml). The reaction mixture was quenched after 84 h by dropwise addition of D2O (3 ml) (Table 7, entries 45, 46).

(b) A 1.08 M solution of phenethylmagnesium bromide (13.3 ml‚ 14.3 mmole‚ 10.0 mol.eq.) was added to solution of titanium isopropoxide (406 mg‚ 1.43 mmole) in ether (14 ml). The mixture was quenched after 84 h by dropwise addition of D2O (3 ml). (Table 7, entries 47, 48).

**49. Reaction of phenethylmagnesium bromide in ether for 1 h with titanium isopropoxide.** A 0.98 M solution of the Grignard reagent (1.45 ml, 1.4 mmole, 5.0 mol.eq.) was added to titanium isopropoxide (80 mg, 0.28 mmole) in ether (1 ml). The mixture was quenched after 1 h by dropwise addition of D2O (4 ml). (Table 7, entry 49). The dimer (**20**) was found in reaction the mixture by GC/MS.57

**Reduction of (1a) with ethylmagnesium bromide with 1 mol.eq. of TiCl4.2THF** **in THF**

**63.** 1.02 M Grignard reagent (0.49 ml, 0.5 mmole, 1.0 mol.eq.) in THF was added to (**1a**) (145 mg, 0.5 mmole) and TiCl4**.**2THF (191 mg, 0.5 mmole, 1.0 mol.eq.) in dry THF (5 ml) over 10 m. Quenching after 10 m by dropwise addition of water (5 ml) and work up as above gave an oil. There was no reaction by 1H NMR.

**64.** 1.02 M Grignard reagent (0.98 ml, 1.0 mmole, 2.0 mol.eq.) in THF was added to (**1a**) (145 mg, 0.5 mmole) and TiCl4**.**2THF (191 mg, 0.5 mmole, 1.0 mol.eq.) in THF (5 ml) over 10 m. Quenching and work up as above gave an oil which contained by 1H NMR (**2a**)/(**3a**) (15 %, 1.6:1) and (**1a**) (85 %).

**65.** 1.02 M Grignard reagent (1.47 ml, 1.5 mmole, 3.0 mol.eq.) in THF was added to (**1a**) (145 mg, 0.5 mmole) and TiCl4**.**2THF (191 mg, 0.5 mmole, 1.0 mol.eq.) in THF (5 ml) over 10 m. Quenching and work up as above gave a mixture which contained by 1H NMR (**2a**)/(**3a**) (65 %, 1.6:1) and (**1a**) (35 %).

**66.** 1.02 M Grignard reagent (2.94 ml, 3.0 mmole, 6.0 mol.eq.) in THF was added to (**1a**) (145 mg, 0.5 mmole) and TiCl4**.**2THF (191 mg, 0.5 mmole, 1.0 mol.eq.) in THF (5 ml) over 10 m. Quenching after 2 h and work up as above gave a mixture which contained by 1H NMR (**2a**)/(**3a**) (31 %, 1:4) and (**4a**) (69 %).

**Reaction of (1a) with ethylmagnesium bromide in anisole**

**50.** A 0.92 M suspension of ethylmagnesium bromide in anisole (1.09 ml, 1.0 mmole, 1.0 mol.eq.) was added to (**1a**) (290 mg, 1.0 mmole) in dry anisole (1.0 ml) over 10 m. After stirring for 10 m, titanium isopropoxide (14 mg, 0.05 mmole, 5 mol.%) was added, followed after 30 m by ether (0.05 ml, 0.5 mmole). The mixture was quenched after 10 m with water (1 ml) and work up as above gave a mixture which contained by 1H NMR the monobromides (**2a**)/(**3a**) (31 %, 1.6:1) and (**1a**) (68 %).

**51.** A 0.92 M suspension of ethylmagnesium bromide in anisole (1.09 ml, 1.0 mmole, 1.0 mol.eq.) was added to (**1a**) (290 mg, 1.0 mmole), ether (0.2 ml, 2.0 mmole) and titanium isopropoxide (14 mg, 0.05 mmole, 5 mol.%) in dry anisole (1.0 ml) over 10 m. After stirring for 1 h, further Grignard reagent (0.54 ml, 0.5 mmole, 0.5 mol.eq.) was added. Quenching after 3.5 h by dropwise addition of water (1 ml) and work up as above gave an oil which contained by 1H NMR (**2a**)/(**3a**) (95 %, 1.6:1) and (**4a**) (5 %).

**52.** A 0.92 M suspension of ethylmagnesium bromide in anisole (1.09 ml, 1.0 mmole, 1.0 mol.eq.) was added to (**1a**) (290 mg, 1.0 mmole) and titanium isopropoxide (14 mg, 0.05 mmole, 5 mol.%) in dry anisole (1.0 ml) over 10 m. After stirring for 1.7 h, further Grignard reagent (1.09 ml, 1.00 mmole, 1.00 mol.eq.) was added. After 15 h, quenching and work up as above gave an oil which contained by 1H NMR (**2a**)/(**3a**) (89 %, 1.6:1),

(**1a**) (6 %) and (**4a**) (5 %).

**53.** The initial addition was carried out as in 52. After stirring for 30 m further Grignard reagent (1.64 ml, 1.5 mmole, 1.5 mol.eq.) was added. After 4 h quenching and work up as above gave an oil which contained by 1H NMR (**2a**)/(**3a**) (86 %, 1.6:1) and (**4a**) (14 %).

**Reaction of (1a) with phenethylmagnesium bromide in d3-anisole**

A solution of 0.96 M phenethylmagnesium bromide in d3-anisole (1.56 ml, 1.5 mmole, 1.5 mol.eq.) was added to a solution of (**1a**) (290 mg, 1.0 mmole) and titanium tetrachloride (10 mg, 0.05 mmole, 5 mol.%) in dry anisole-d3 (1.0 ml) over 10 m. Quenching after 24 h by dropwise addition of water (1 ml) and and work up as before gave an oil which by GLC the contained monobromides (**2a**)/(**3a**) (23 %, 1.7:1, containing no D by MS), (**1a**) (77 %), ethylbenzene (89 %, no D by MS), of styrene (8 %), 1,4-diphenylbutane (9 %).

**Reduction of phenethyl bromide**

1.04 M Ethylmagnesium bromide (1.06 ml, 1.1 mmole, 1.1 mol.eq.) was added to phenethyl bromide (185 mg, 1.0 mmole) and titanium isopropoxide (7 mg, 0.02 mmole, 2 mol.%) in ether (1 ml) over 10 m. Quenching after 10 m by dropwise addition of H2O (1 ml) and work up as above gave a mixture which by GLC contained 1.3 % of ethylbenzene and 98.7 % of starting material.

**Additional spectroscopic data for known compounds**

**3-Ethylhexan-3-ol.** m/z 102 (3, M+), 87 (8, M+-Me), 84 (1, M+-OH), 73 (100, M+-Et), 59 (32, M+-Pr), 57 (18))

**1-Propylcyclopropan-1-ol.** m/z 100 (2, M+), 85 (13, M+-Me).

**Butan-2-yl ethyl ether.** H: 0.87 (3H, t, J 7.4 Hz), 1.09 (3H, d, J 6.1 Hz), 1.17 (3H, t, J 7.0 Hz), 1.30 – 1.60 (2H, m), 3.20 – 3.32 (1H, m), 3.32 – 3.44 (1H, m), 3.44 – 3.60 ( 1H, m); C: 9.7+, 15.5+, 19.2+, 29.2-, 63.4-, 76.3+; GC/MS: 102 (1), 87 (10), 73 (100), 59 (28), 57 (15); max.: 2973 s, 2931 s, 2876 s, 1458 m, 1373 m, 1338 m, 1299 w, 1143 m, 1111 s, 1079 s.

**Butan-2-yl propan-2-yl ether.** H: 0.88 (3H, t, J 7.1 Hz), 1.12 (6H, dd, J 6.1, 6.1 Hz), 1.45 (3H, d, J 6.1 Hz), 1.30 – 1.55 (2H, m), 3.36 (1H, sex., J 6.1 Hz), 3.63 (1H, sept., J 6.1 Hz); C: 10.0+, 20.3+, 22.5+, 23.1+, 29.9-, 68.9+, 74.0+; max.: 2971 s, 2930 s, 2876 s, 1465 m, 1376 m, 1329 m, 1167 m, 1116 s, 1042 s, 1009 m.

**2,3-Diethoxybutane.**(As a mixture of diastereoisomers) H: 1.0-1.2 (12H, m), 3.2 -3.7 (6H, m); C: 14.9+, 15.5+, 15.6+, 16.0+, 64.5-, 64.7-, 77.3+, 78.1+; max.: 2979 s‚ 2931 s‚ 2875 s‚ 1483 m‚ 1446 m‚ 1346 m‚ 1116 s‚ 1003 m‚ 928 m‚ 839 m; GC/MS: 146 (0.3), 103 (0.3), 101 (0.3), 91 (5), 73 (100), 57 (3), 55 (3).
